# Supplementary material
Source: bioRxiv or medRxiv preprint supplement (https://www.biorxiv.org/highwire/filestream/95721/field_highwire_adjunct_files/0/311753-1.pdf)
Supplement: Supplementary file [file 311753-1.pdf]

## Supplementary Information

### Clear, extended field-of-view single-molecule imaging by highly inclined swept illumination

Jialei Tang & Kyu Young Han

CREOL, The College of Optics and Photonics, University of Central Florida, Orlando, Florida, USA.  
Correspondence should be addressed to K.Y.H. ([kyhan@creol.ucf.edu](mailto:kyhan@creol.ucf.edu)).

#### Supplementary Figures

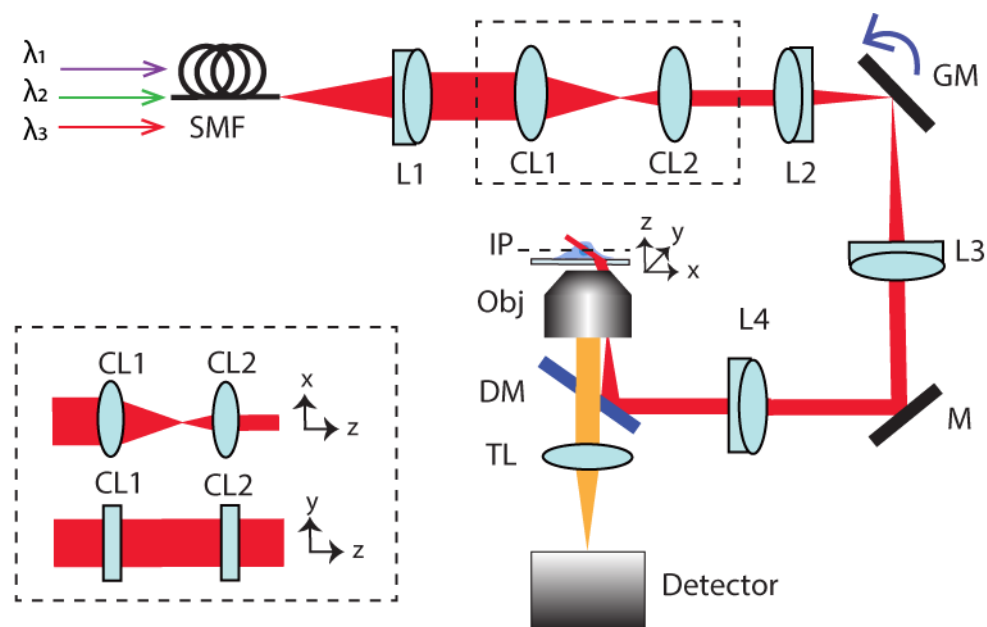

**Supplementary Figure 1.** Detailed experimental scheme of Highly Inclined Swept Tiles (HIST) microscopy.  $\lambda_1 = 405$  nm,  $\lambda_2 = 561$  nm,  $\lambda_3 = 638$  nm; CL1-2, cylindrical lenses; DM, dichroic mirror; GM, galvo mirror; IP, imaging plane; L1-6, lenses; M, mirror; SMF, single mode fiber; TL, tube lens.

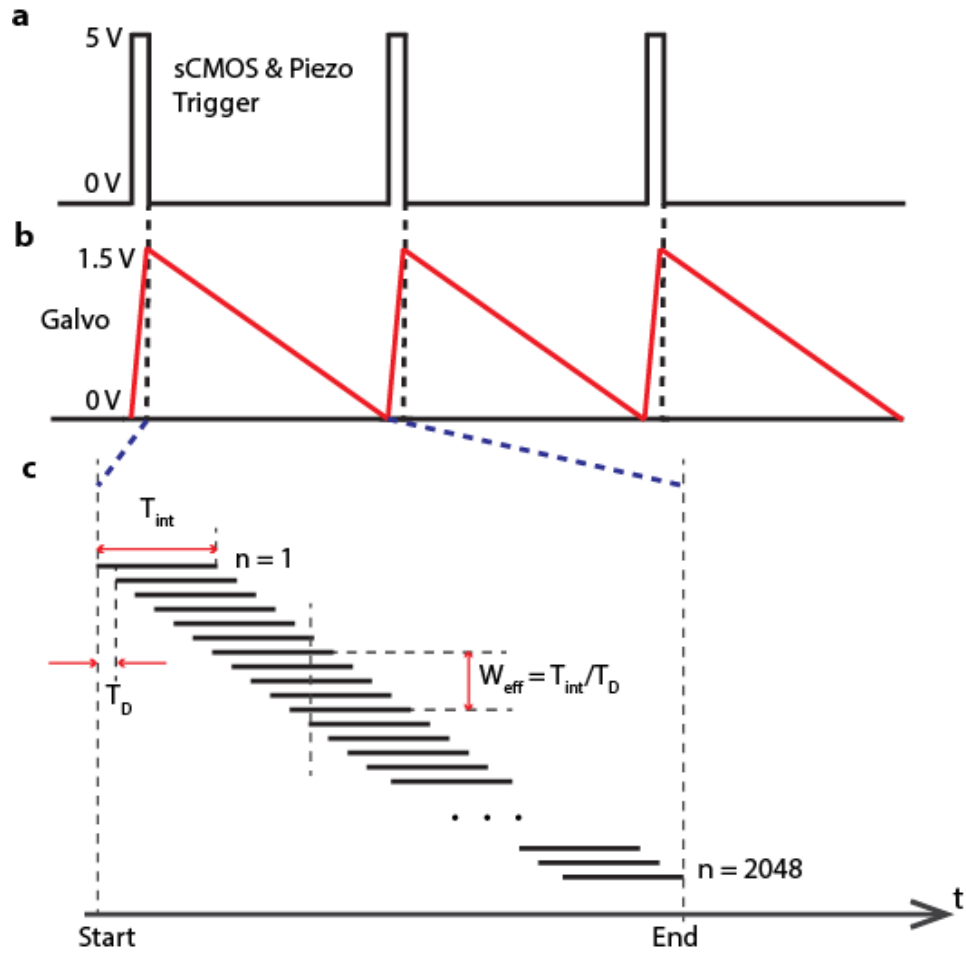

**Supplementary Figure 2.** DAQ timing diagram. (a,b) A trigger signal from a function generator starts the galvo mirror and sCMOS acquisition. (c) Details of light sheet rolling shutter mode control.  $T_{int}$  is the integration time of each pixel line,  $T_D$  is the delay time of consecutive pixels,  $W_{eff}$  is the effective acquisition width. In our experiments, we used  $T_{int} = 60$  ms,  $T_D = 0.36$  ms and  $W_{eff} = 166$ .

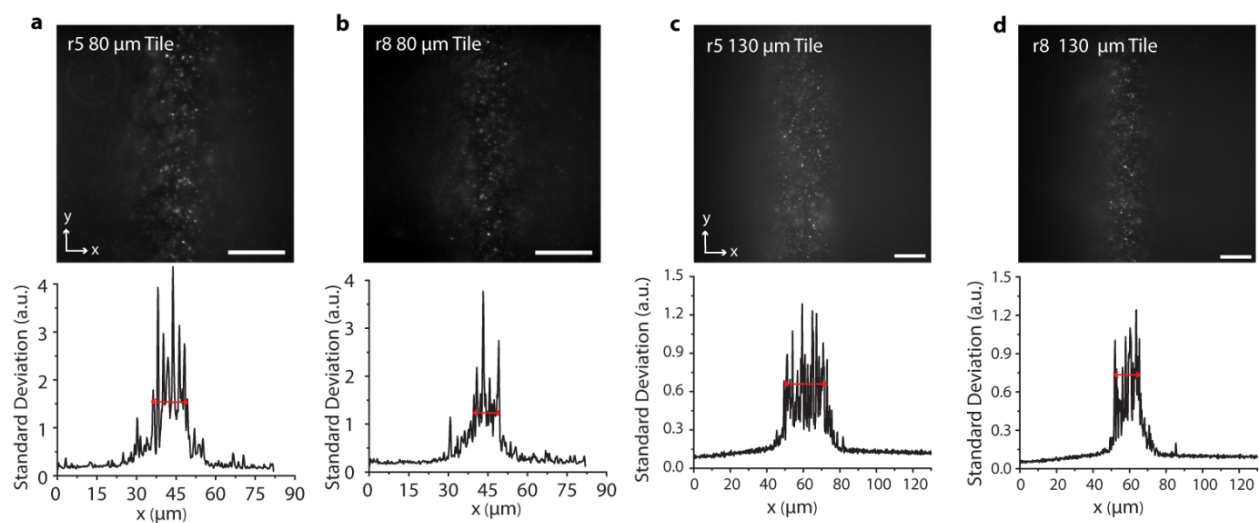

**Supplementary Figure 3.** Effective beam width of tile illumination. (top) Fluorescence images of 20 nm beads in 3D hydrogel using a compression ratio of 5 and 8 with a tile length of 80  $\mu\text{m}$  or 130  $\mu\text{m}$ , respectively. Scale bar, 20  $\mu\text{m}$ . (bottom) Standard deviation projection along y direction for each image. The illumination widths of  $r = 5$  and  $r = 8$  for  $\sim 80 \mu\text{m}$  tile are  $\sim 10 \mu\text{m}$  and  $\sim 14 \mu\text{m}$ , and those of  $r = 5$  and  $r = 8$  for  $\sim 130 \mu\text{m}$  tile are  $\sim 14 \mu\text{m}$  and  $\sim 24 \mu\text{m}$ , indicated by the double sided red arrows.

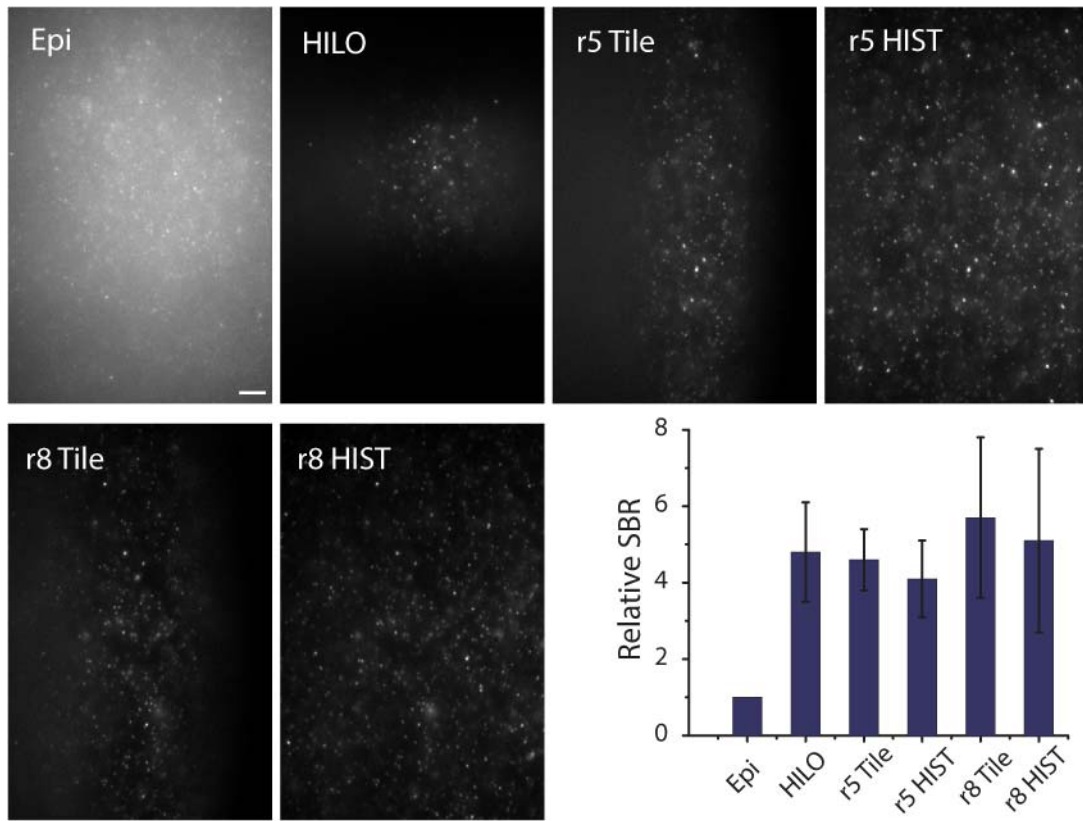

**Supplementary Figure 4.** Images of 20 nm beads in hydrogel and signal to background ratio (SBR) using different illumination methods at  $z = 5 \mu\text{m}$ . Scale bar,  $5 \mu\text{m}$ .

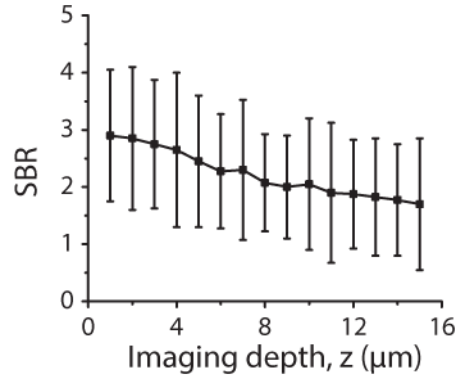

**Supplementary Figure 5.** SBR dependence on imaging depth using 20 nm beads in 3D hydrogel using  $r = 8$  HIST illumination system.

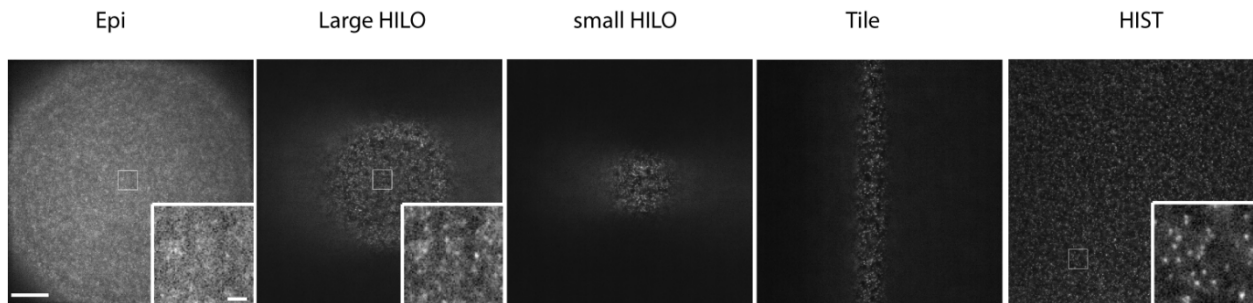

**Supplementary Figure 6.** Fluorescence background corrected images of single Atto647N DNA in 3D hydrogel by epi, large area HILO, small area HILO, tile and HIST illumination. The images were taken 5 μm above the surface. Scale bar, 20 μm and 2 μm (inset).

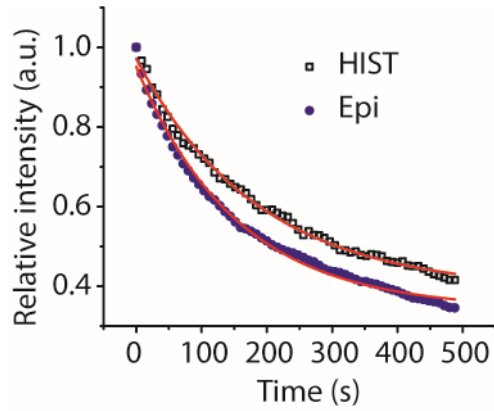

**Supplementary Figure 7.** Photobleaching curves for  $130 \times 130 \times 5 \mu\text{m}^3$  volume of Atto647N DNA in a hydrogel sample by epi and HIST illumination. The decay rates are  $6.5 \times 10^{-3} \text{ s}^{-1}$  and  $5.4 \times 10^{-3} \text{ s}^{-1}$ , respectively. Red curves are single exponential fits.

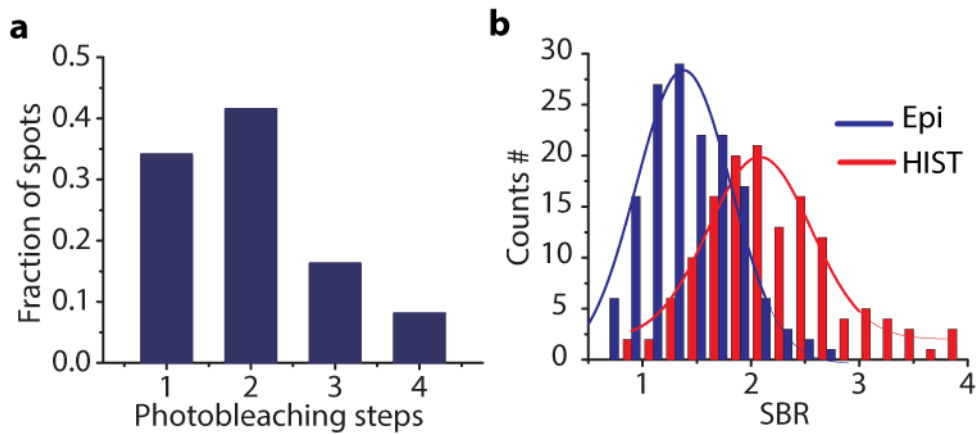

**Supplementary Figure 8.** Photobleaching step distribution (a) and SBR distribution (b) for 4 FISH probes in A549 cells. The blue and red curves are Gaussian fitting for the distributions. 211 mRNA spots were used.

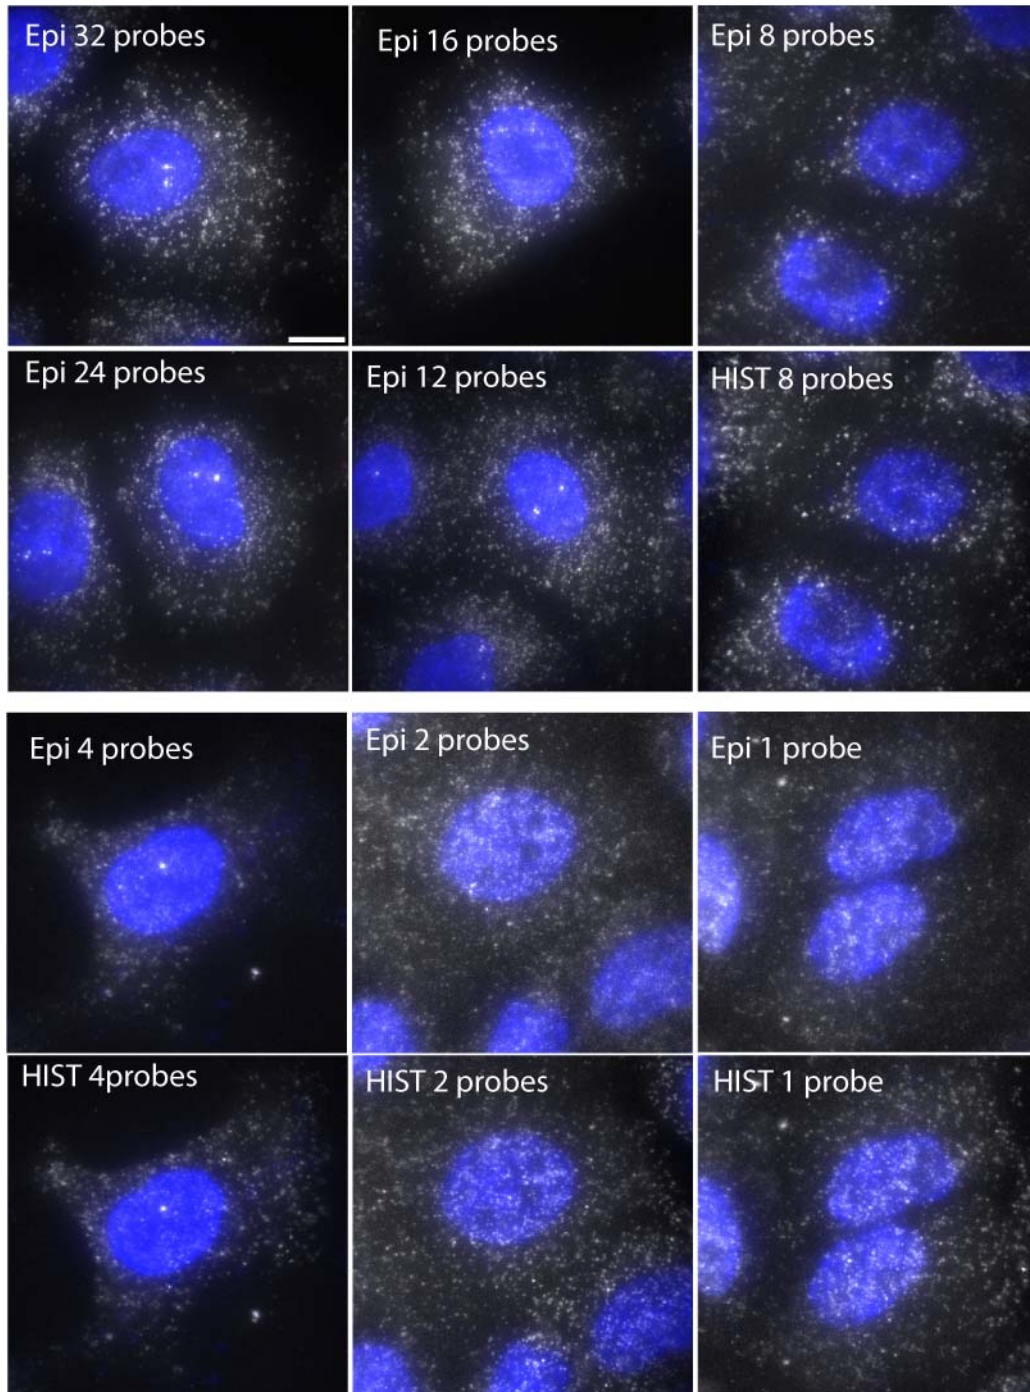

**Supplementary Figure 9.** smFISH images in A549 cells with different number of probes using epi or HIST illumination. The DAPI stain is in blue and *EEF2* transcript is in white. A maximum intensity projection was performed on 20 z-stacks (5  $\mu\text{m}$  thickness). The illumination power was 24  $\text{W}/\text{cm}^2$  and the integration time was 400 ms. Scale bar 10  $\mu\text{m}$ .

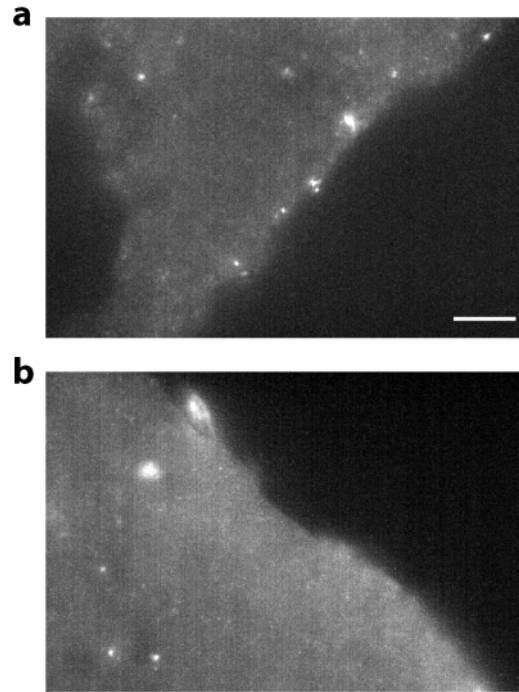

**Supplementary Figure 10.** Control experiments for mouse brain tissue smFISH imaging. (a) A mouse brain tissue without any FISH probes. (b) Mouse brain smFISH image with 0.5% RNase treatment. Scale bar, 10  $\mu\text{m}$ .



**Supplementary Table 1.** DNA sequences.

| Name   | Sequence                                     | Experiment              |
|--------|----------------------------------------------|-------------------------|
| probe1 | 5'-/ Acryd/GCCTCGCTGCCGTCGCCA/3ATTO647NN/-3' | Single probe hydrogel   |
| P1     | /5AmMC6/CCC AGG TAG AAC CGA AAG AA           | <i>EEF2</i> A549 cells  |
| P2     | /5AmMC6/CTA CCG TGA AGT TCA CCA TG           |                         |
| P3     | /5AmMC6/CAG ACA TGT TGC GGA TGT TG           |                         |
| p4     | /5AmMC6/GTA TCA GTG AAG CGT GTC TC           |                         |
| p5     | /5AmMC6/GTT GAC TTG ATG GTG ATG CA           |                         |
| P6     | /5AmMC6/GCT CGT AGA AGA GGG AGA TG           |                         |
| P7     | /5AmMC6/ATG AGG TTG ATG AGG AAG CC           |                         |
| P8     | /5AmMC6/TCC GAG GAG AAG TCG ACA TG           |                         |
| P9     | /5AmMC6/CTT GTT CAT CAT CAG CAC AG           |                         |
| P10    | /5AmMC6/ACG ATG CGC TGG AAA GTC TG           |                         |
| P11    | /5AmMC6/GTA GGT GGA GAT GAT GAC GT           |                         |
| P12    | /5AmMC6/CGA GGA CAG GAT CGA TCA TG           |                         |
| P13    | /5AmMC6/AAA CTG CTT CAG GGT GAA GG           |                         |
| P14    | /5AmMC6/AAC TTG GCC ACA TAC ATC TC           |                         |
| P15    | /5AmMC6/TGG CTG ACT TGC TGA ACT TG           |                         |
| P16    | /5AmMC6/AAG ATG GGG TCC AGG ATC AG           |                         |
| P17    | /5AmMC6/CAT GAT CGC ATC AAA CAC CT           |                         |
| P18    | /5AmMC6/TGG ATG GTG ATC ATC TGC AA           |                         |
| P19    | /5AmMC6/TAG AAC CGA CCT TTG TCG GA           |                         |
| P20    | /5AmMC6/CCG AGA AGA CTC GTC CAA AG           |                         |
| P21    | /5AmMC6/TGG ATT GGC TTC AGG TAG AG           |                         |
| P22    | /5AmMC6/GCC CAT CAT CAA GAT TGT TC           |                         |
| P23    | /5AmMC6/AAT GTT CCC ACA AGG CAC AT           |                         |
| P24    | /5AmMC6/TGA ACT TCA TCA CCC GCA TG           |                         |
| P25    | /5AmMC6/ACT CTG ACA ACA GGG CTG AC           |                         |
| P26    | /5AmMC6/CGA TGA TGC ACT GCA CCA TG           |                         |
| P27    | /5AmMC6/ACG TTC GAC TCT TCA CTG AC           |                         |
| P28    | /5AmMC6/TTG TTG GGG GAC TTG GAG AG           |                         |
| P29    | /5AmMC6/CAA AGC ACC AGA TCT TGC GG           |                         |
| P30    | /5AmMC6/TGA TGT CGG TGA GGA TGT TG           |                         |
| P31    | /5AmMC6/CTT GAT CTC GTT GAG GTA CT           |                         |
| P32    | /5AmMC6/GTC AGC ACA CTG GCA TAG AG           |                         |
| M1     | /5AmMC6/GCT CGT AGA AGA GGG AGA TG           | <i>EEF2</i> mouse brain |
| M2     | /5AmMC6/ATG AGG TTG ATG AGG AAG CC           |                         |
| M3     | /5AmMC6/AAA CTG CTT CAG GGT GAA GG           |                         |
| M4     | /5AmMC6/AAC TTG GCC ACA TAC ATC TC           |                         |
| M5     | /5AmMC6/CAA AGC ACC AGA TCT TGC GG           |                         |
